# Supplementary material for: Plasma exosome-derived connexin43 as a promising biomarker for melanoma patients
Source: PubMed Central journal article supplement (PMC10012581; doi:10.1186/s12885-023-10705-9), 2023-03-14
Supplement: 12885_2023_10705_MOESM1_ESM.pdf [file 12885_2023_10705_MOESM1_ESM.pdf]

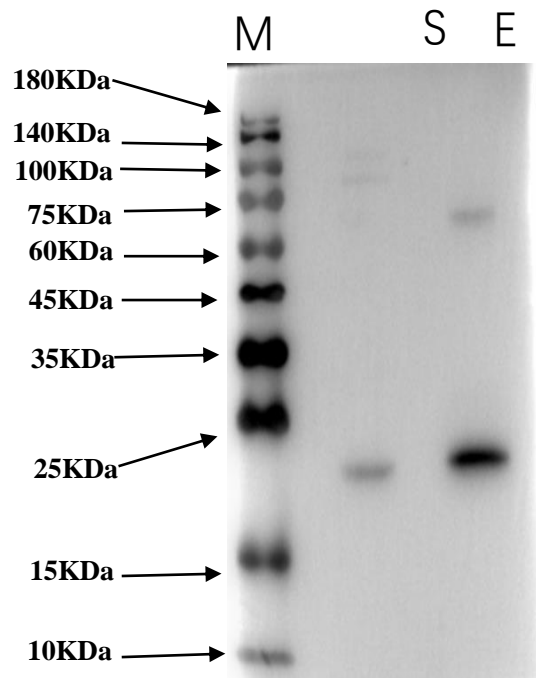

CD9, 25KDa, 30S

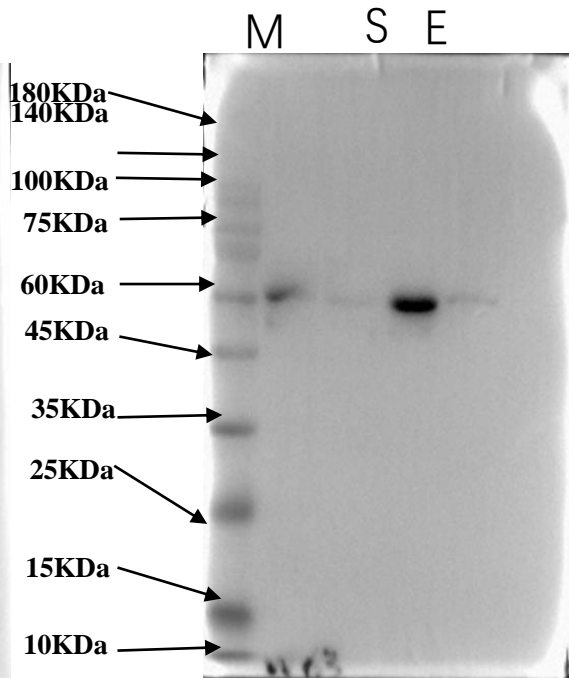

CD63, 53KDa, 150S

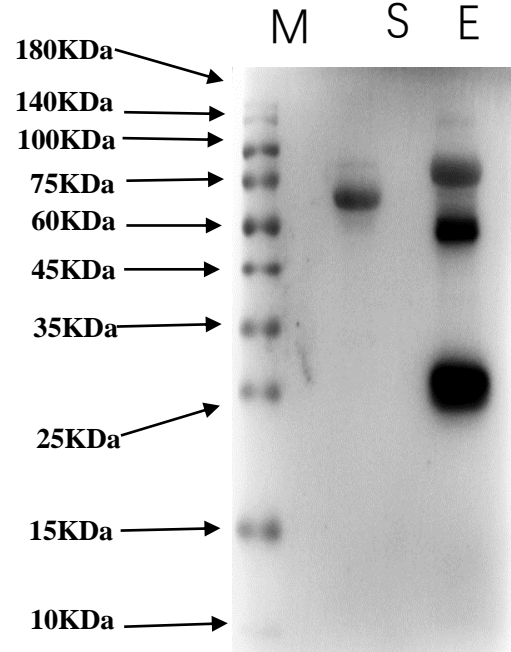

TSG101, 44KDa, 30S

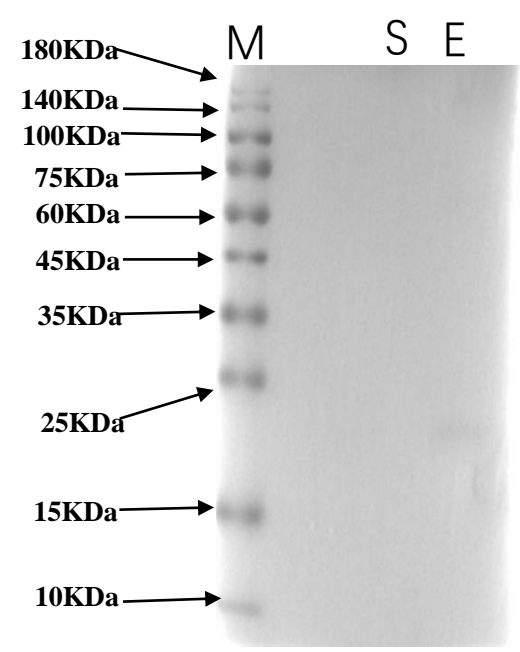

Calnexin, 94KDa, 60S
